# Supplementary material for: Aza-BODIPY-based D–π–A conjugated polymers with tunable band gap: synthesis and near-infrared emission
Source: Royal Society of Chemistry journal article supplement (doi:10.1039/c2py20677c), 2012-09-11

## Supporting Information

### **Aza-BODIPY-based D- $\pi$ -A Conjugated Polymers with Tunable Band**

#### **Gap: Synthesis and Near-Infrared Emission**

Xiao Ma, Xuerong Mao, Shuwei Zhang, Xiaobo Huang, Yixiang Cheng\*, Chengjian Zhu\*  
Key Lab of Mesoscopic Chemistry of MOE, School of Chemistry and Chemical Engineering,  
Nanjing University, Nanjing 210093, China

#### **Contents:**

1.  $^1\text{H}$  NMR and  $^{13}\text{C}$  NMR spectra of the compounds
2. Mass spectrum

## $^1\text{H}$ NMR and $^{13}\text{C}$ NMR spectra of the compounds

### $^1\text{H}$ NMR of **3** in $\text{CDCl}_3$

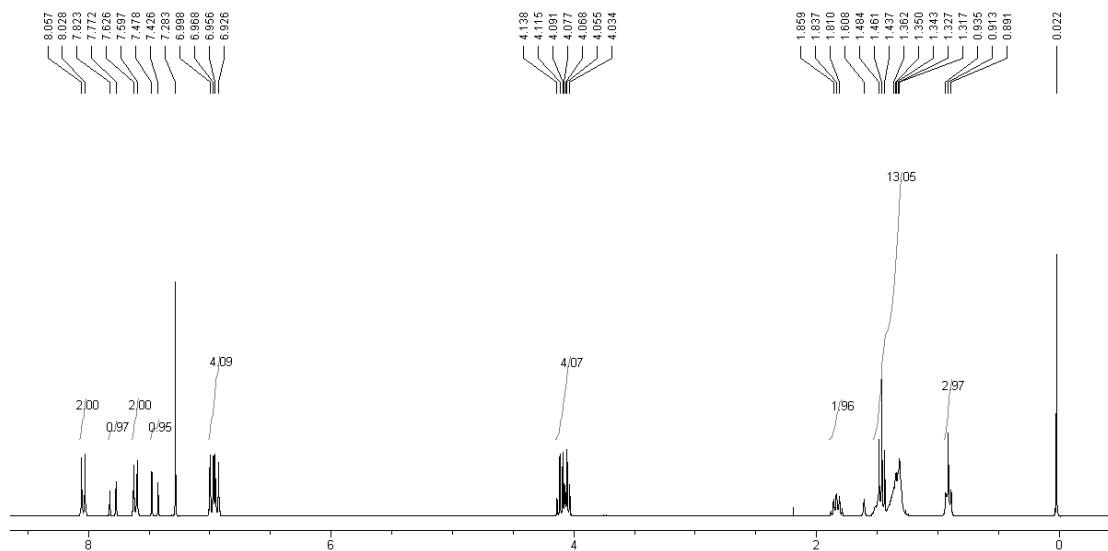

### $^{13}\text{C}$ NMR of **3** in $\text{CDCl}_3$

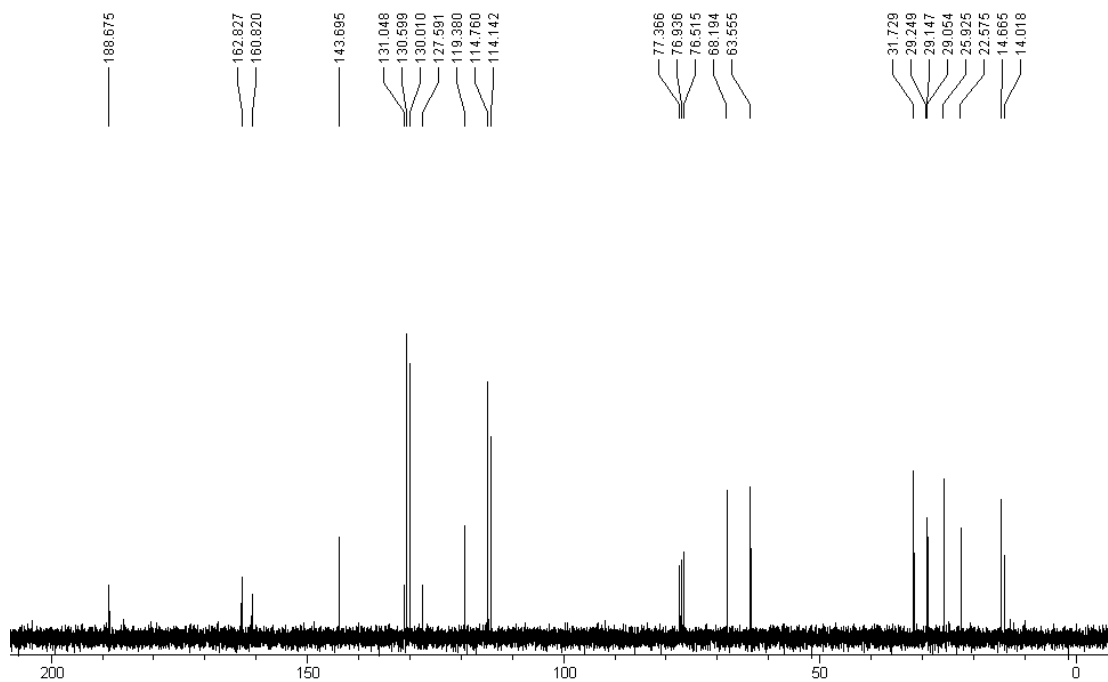

$^1\text{H}$  NMR of **4** in  $\text{CDCl}_3$

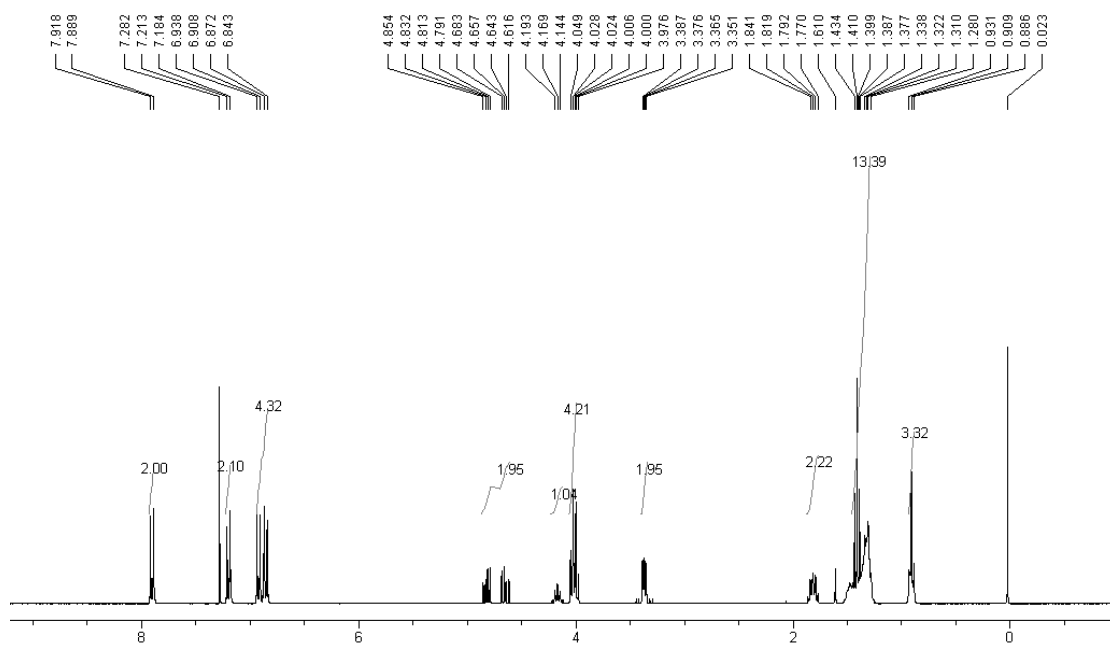

$^{13}\text{C}$  NMR of **4** in  $\text{CDCl}_3$

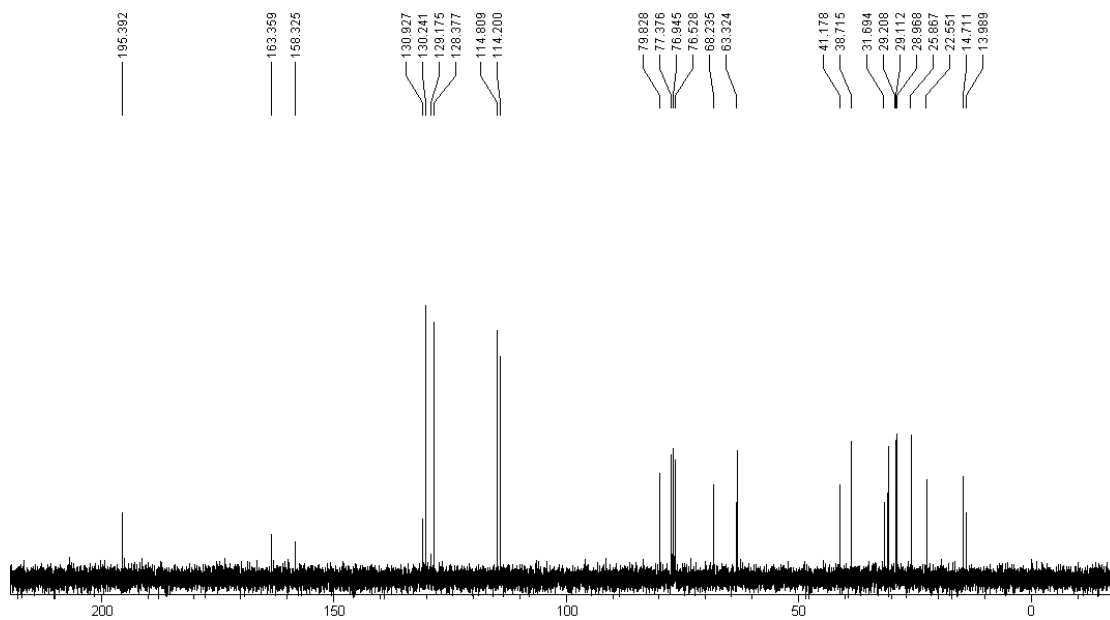

$^1\text{H}$  NMR of **5** in  $\text{CDCl}_3$

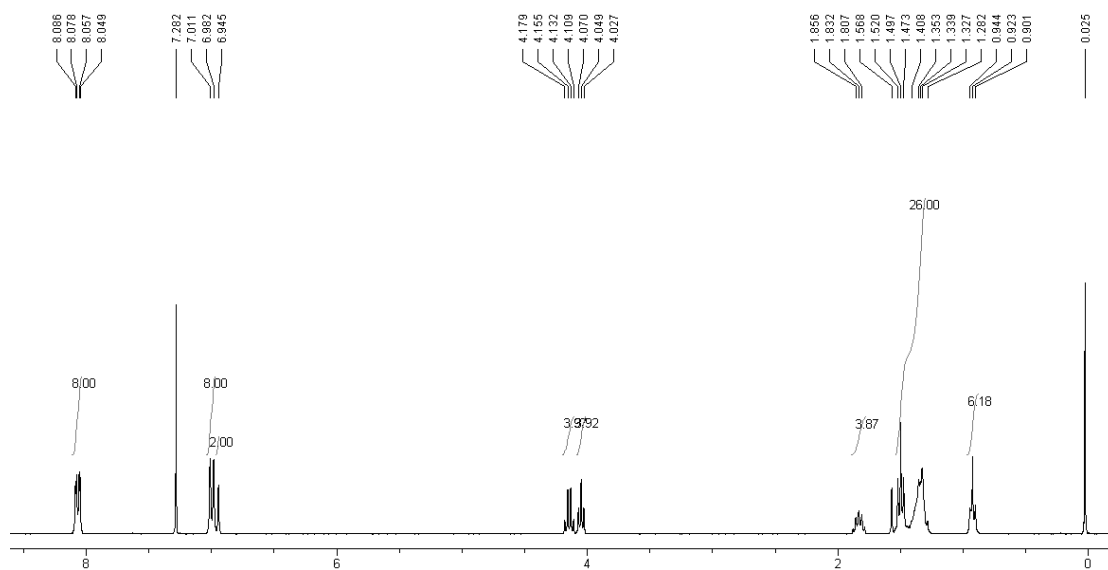

$^{13}\text{C}$  NMR of **5** in  $\text{CDCl}_3$

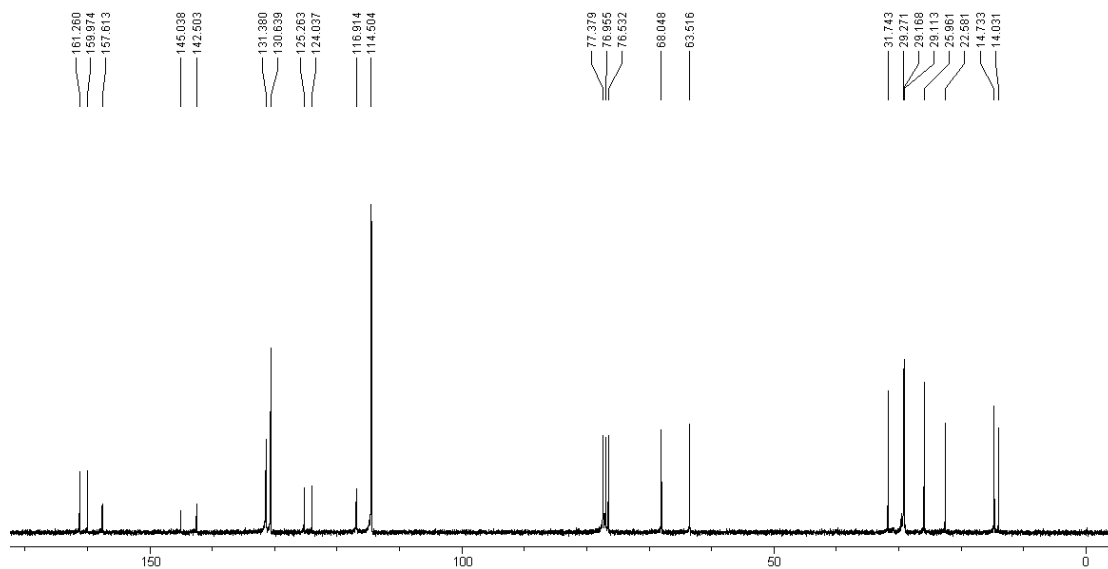

$^1\text{H}$  NMR of **M-1** in  $\text{CDCl}_3$

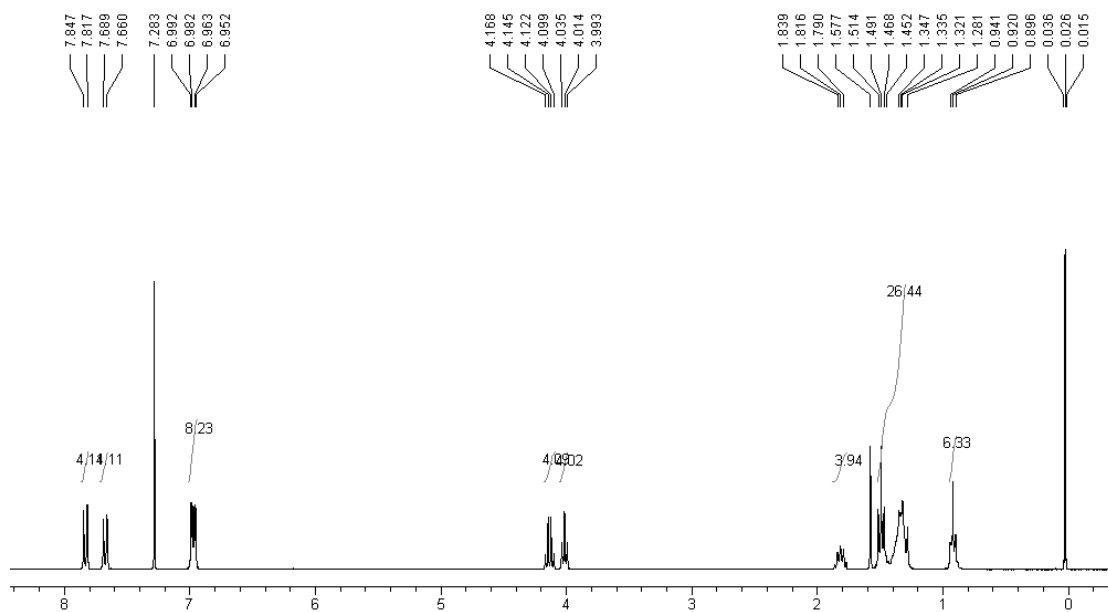

$^{13}\text{C}$  NMR of **M-1** in  $\text{CDCl}_3$

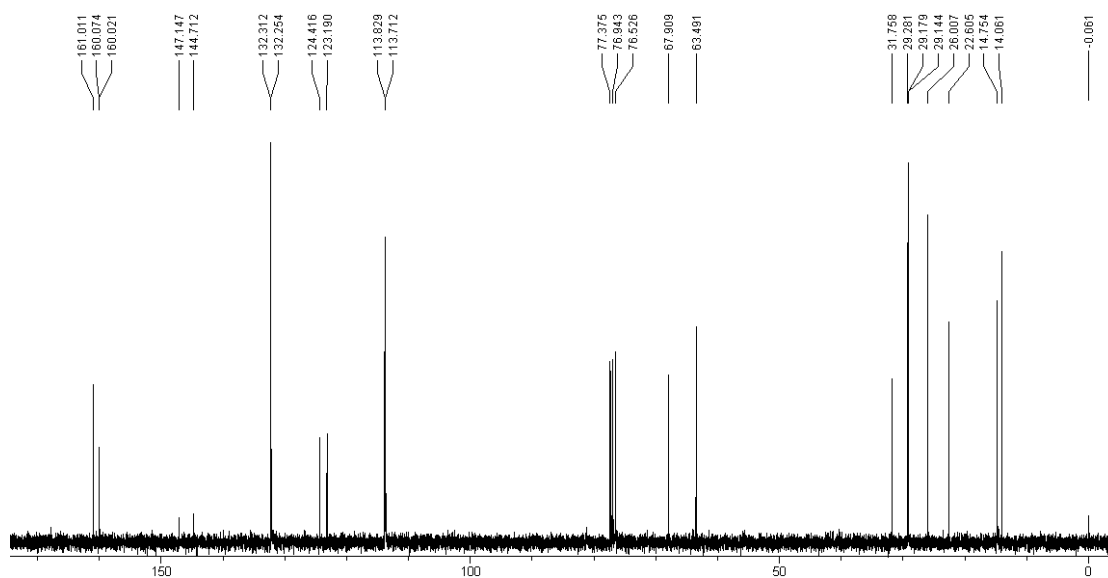

$^1\text{H}$  NMR of **M-2** in  $\text{CDCl}_3$

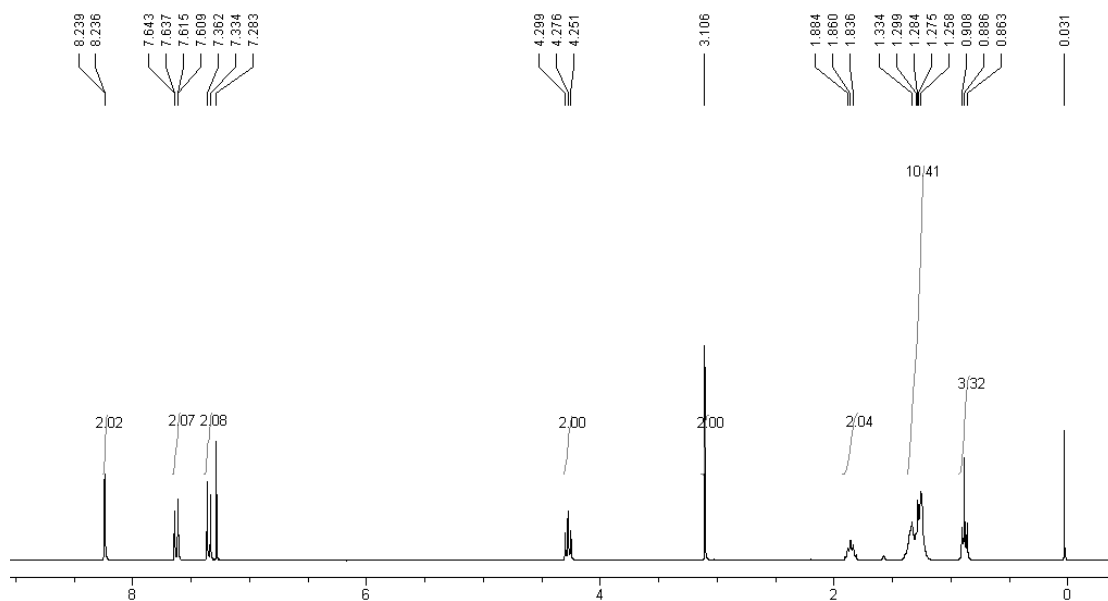

$^{13}\text{C}$  NMR of **M-2** in  $\text{CDCl}_3$

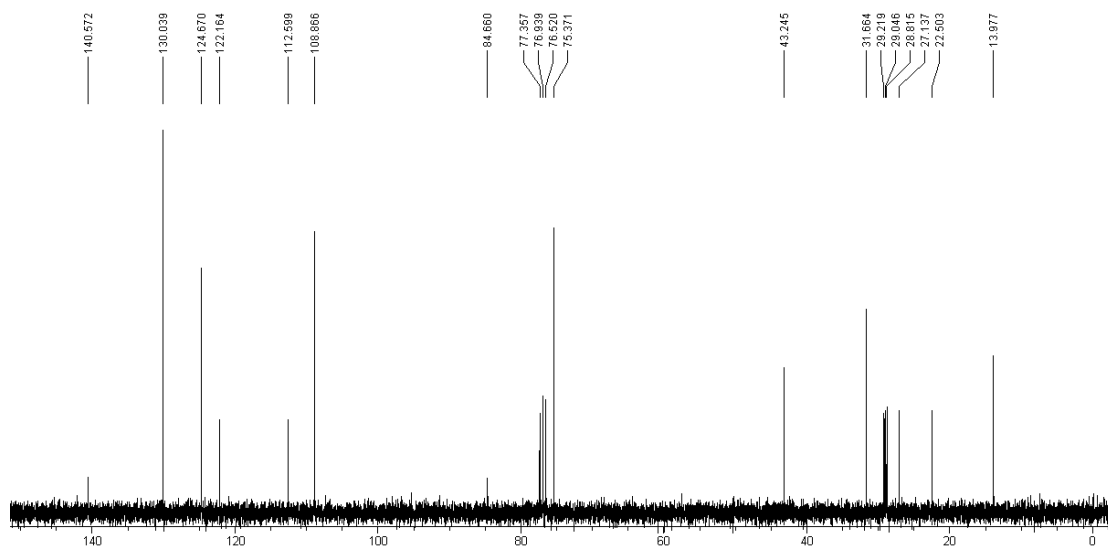



$^1\text{H}$  NMR of **M-4** in  $\text{CDCl}_3$

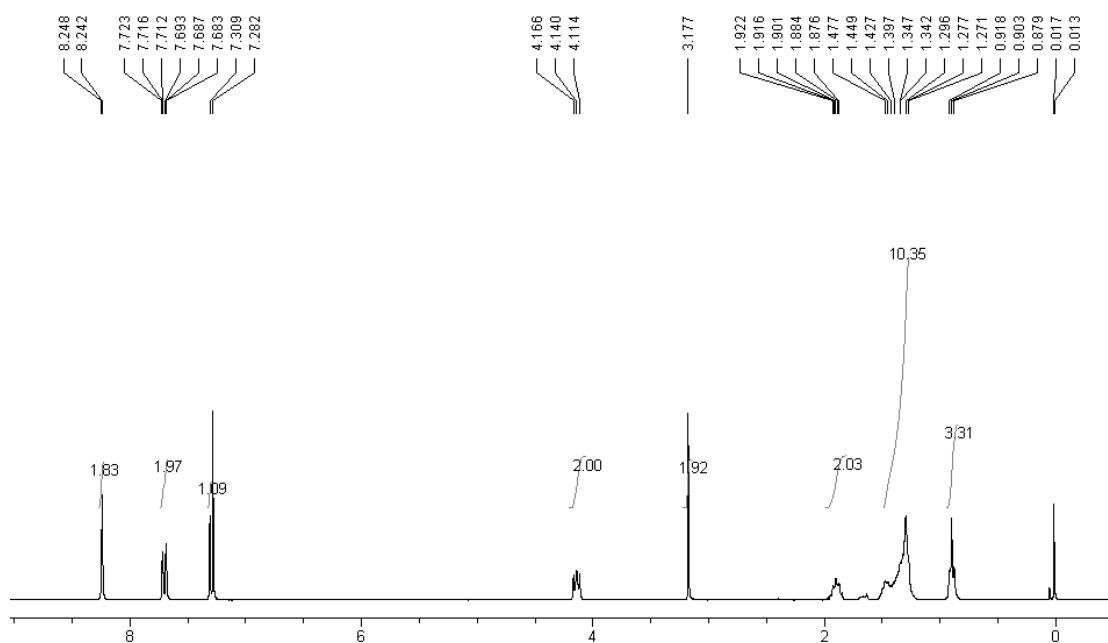

$^{13}\text{C}$  NMR of **M-4** in  $\text{CDCl}_3$

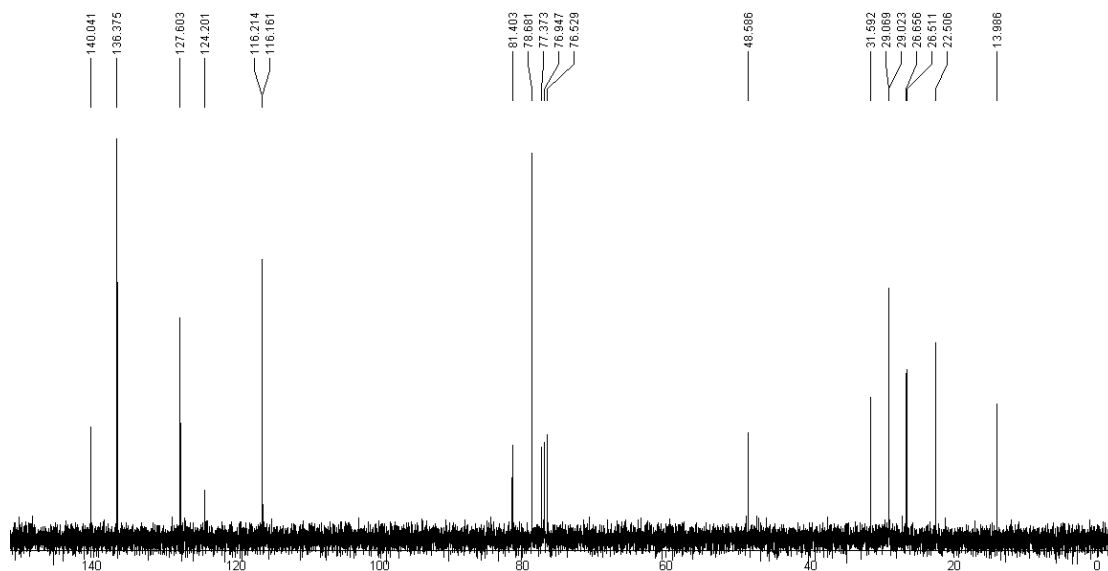



$^1\text{H}$  NMR spectrum of **P1** in  $\text{CDCl}_3$

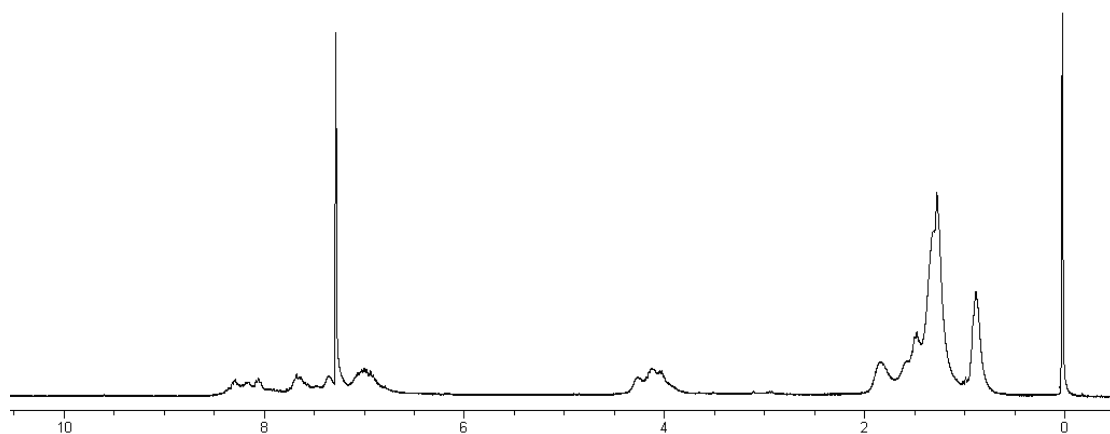

$^1\text{H}$  NMR spectrum of **P2** in  $\text{CDCl}_3$

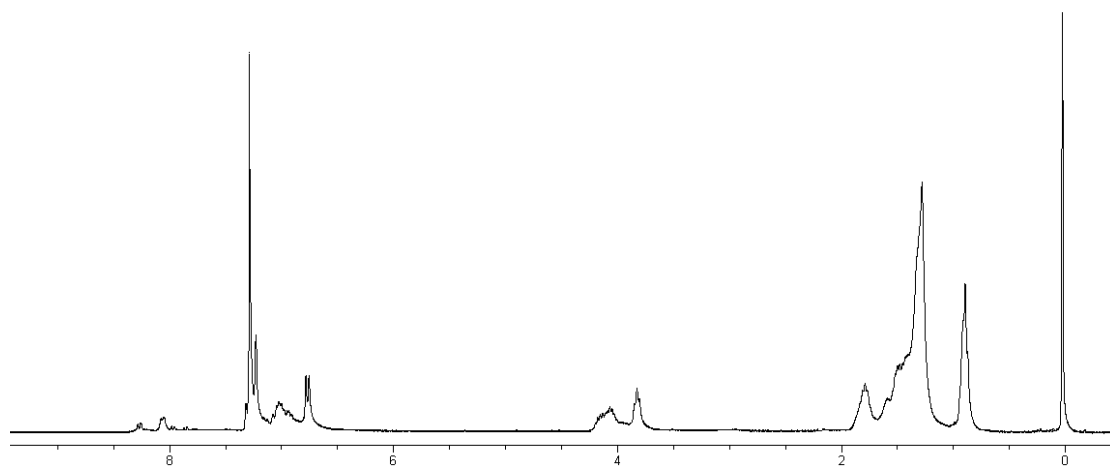

$^1\text{H}$  NMR spectrum of **P3** in  $\text{CDCl}_3$

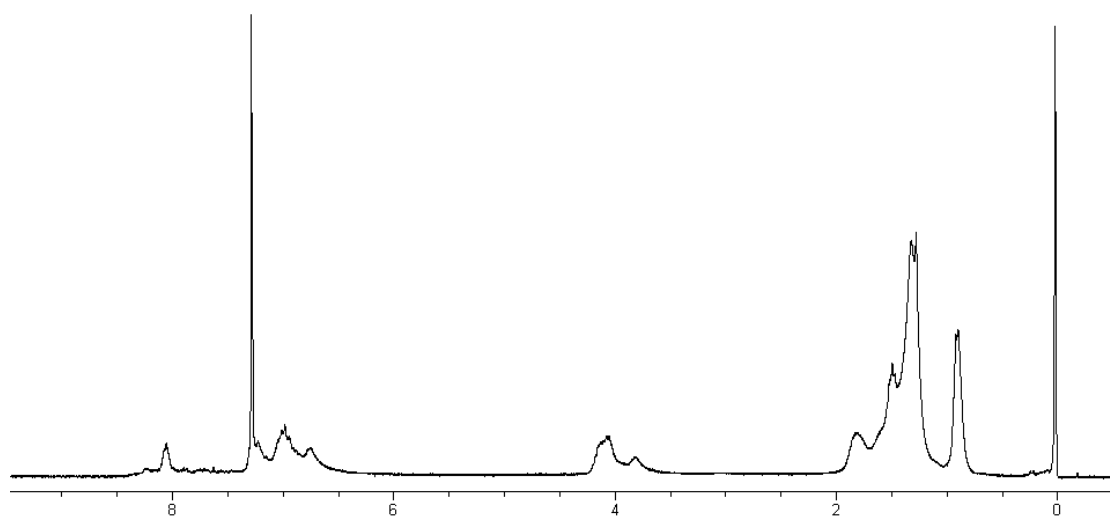

## Mass spectrum

### Compound 3

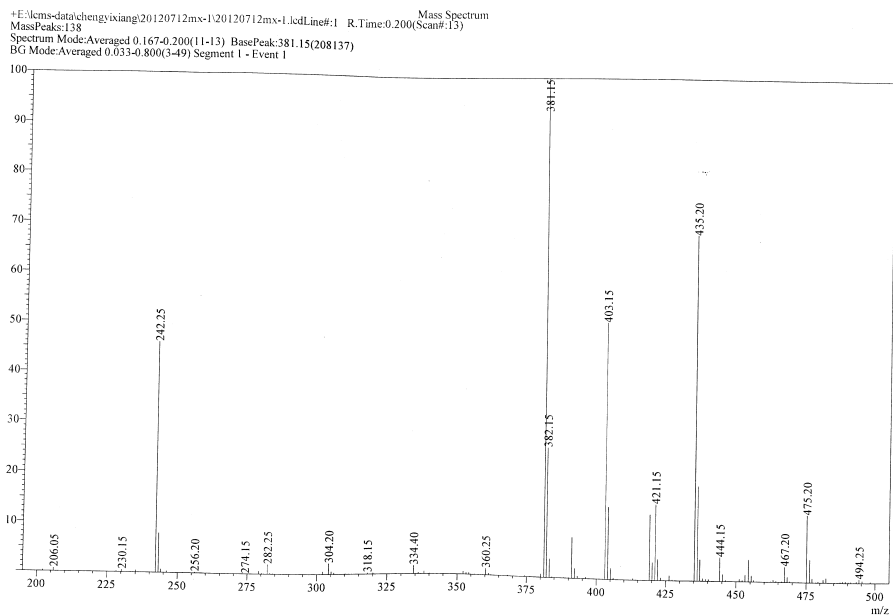

### Compound 4

E:\lcms-data\chengyixiang\20120712mx-1\20120712mx-2.lcd  
+Line#:5 R.Time:0.267(Scan#:17)  
MassPeaks:158  
Spectrum Mode:Averaged 0.167-0.267(11-17) BasePeak:464.15(389192)  
BG Mode:Averaged 0.033-0.833(3-51) Segment 1 - Event 1

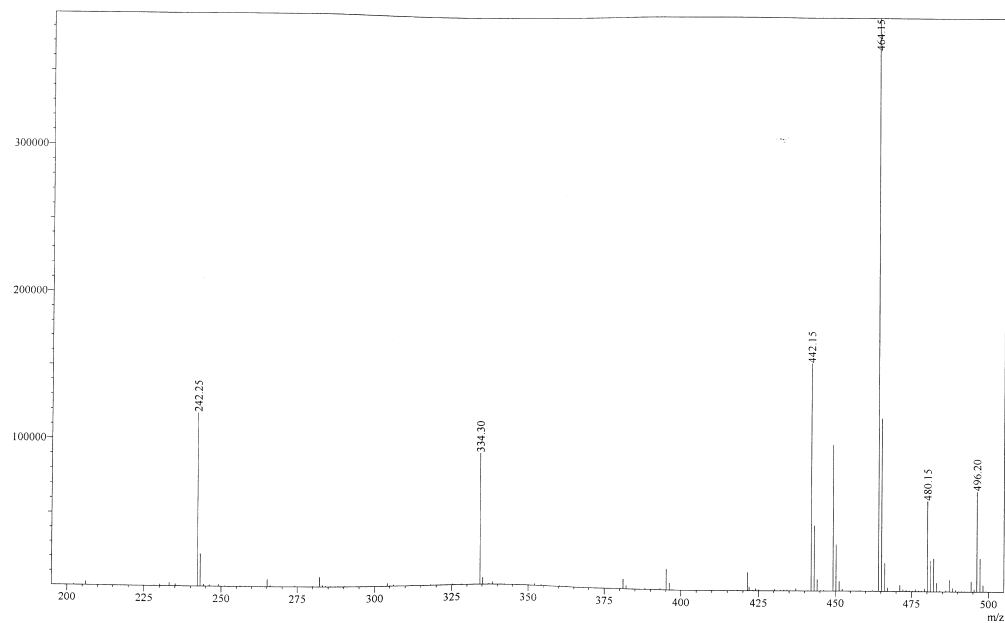

### Compound 5

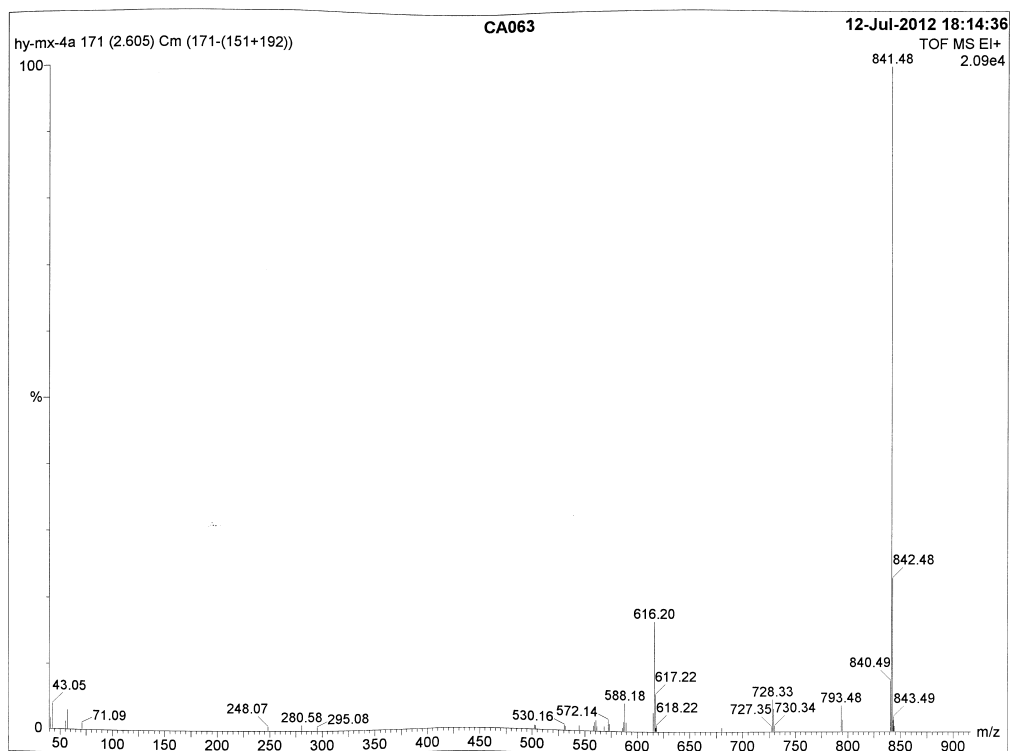

### Compound M-1

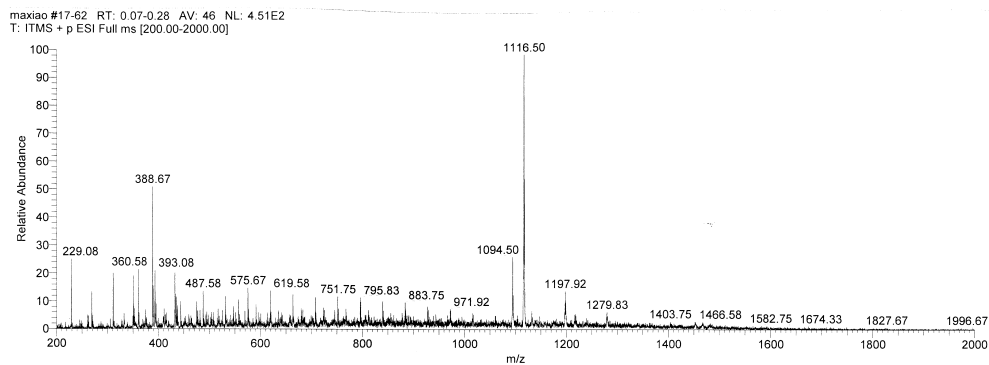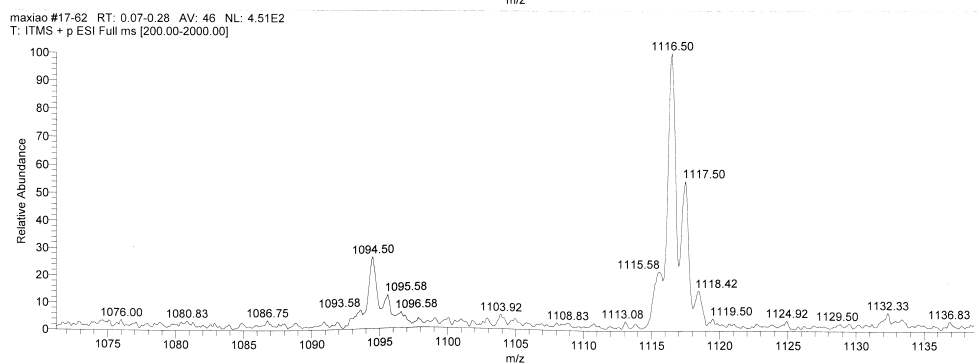

### Compound M-3

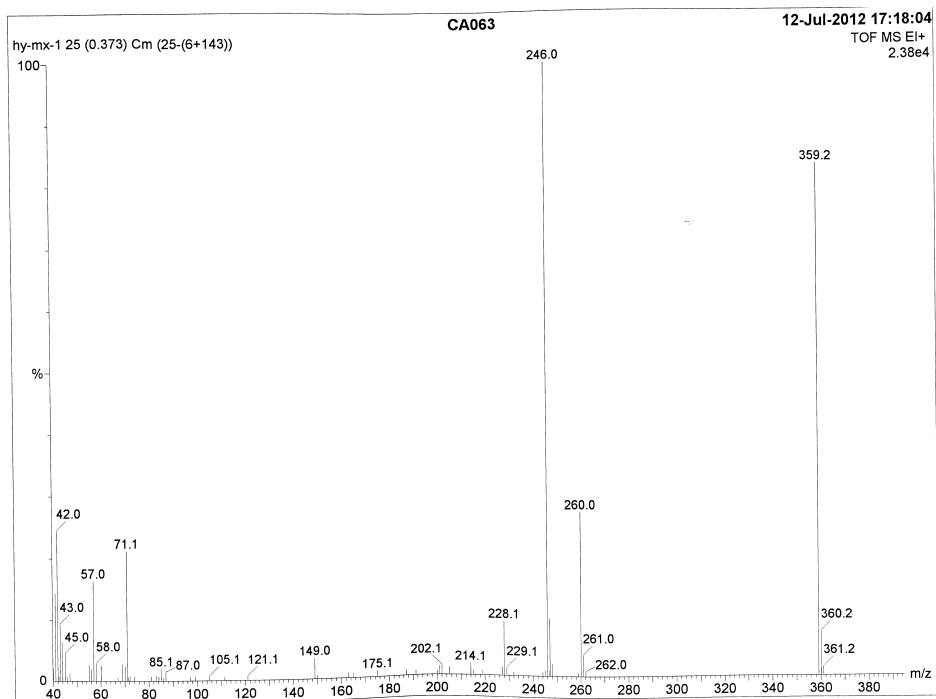

### Compound M-4

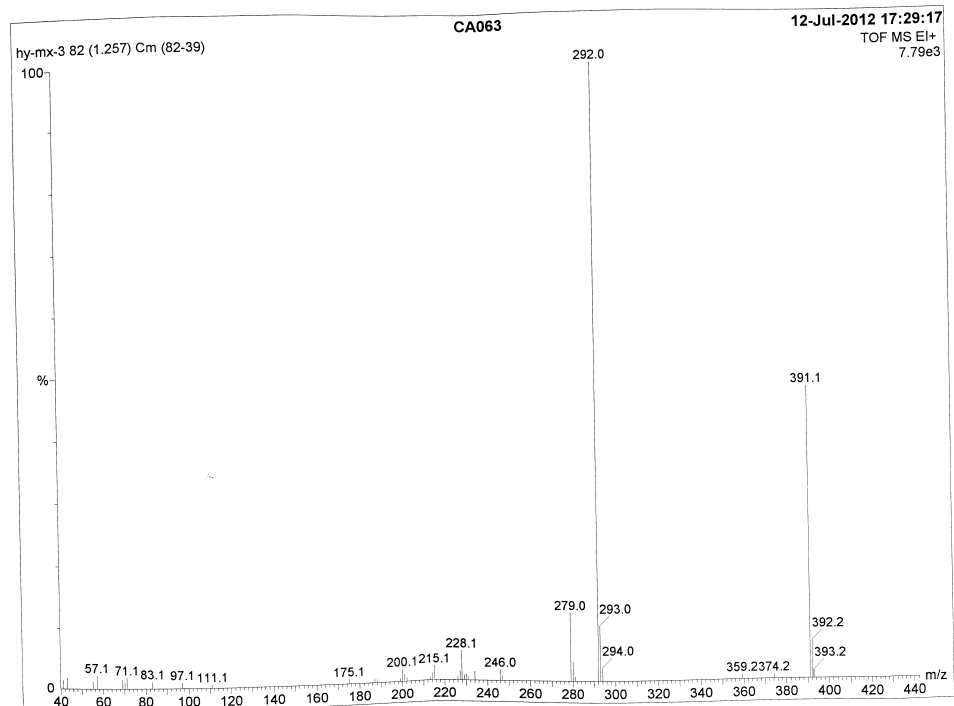

Supplement: c2py20677c.pdf [file c2py20677c.pdf]
